# Supplementary material
Source: Springer Nature journal article supplement (https://www.springermedizin.de/resource/supplementary/12943_2012_1091_MOESM4_ESM.pdf/9552326)
Supplement: MOESM4 [file 9552326]

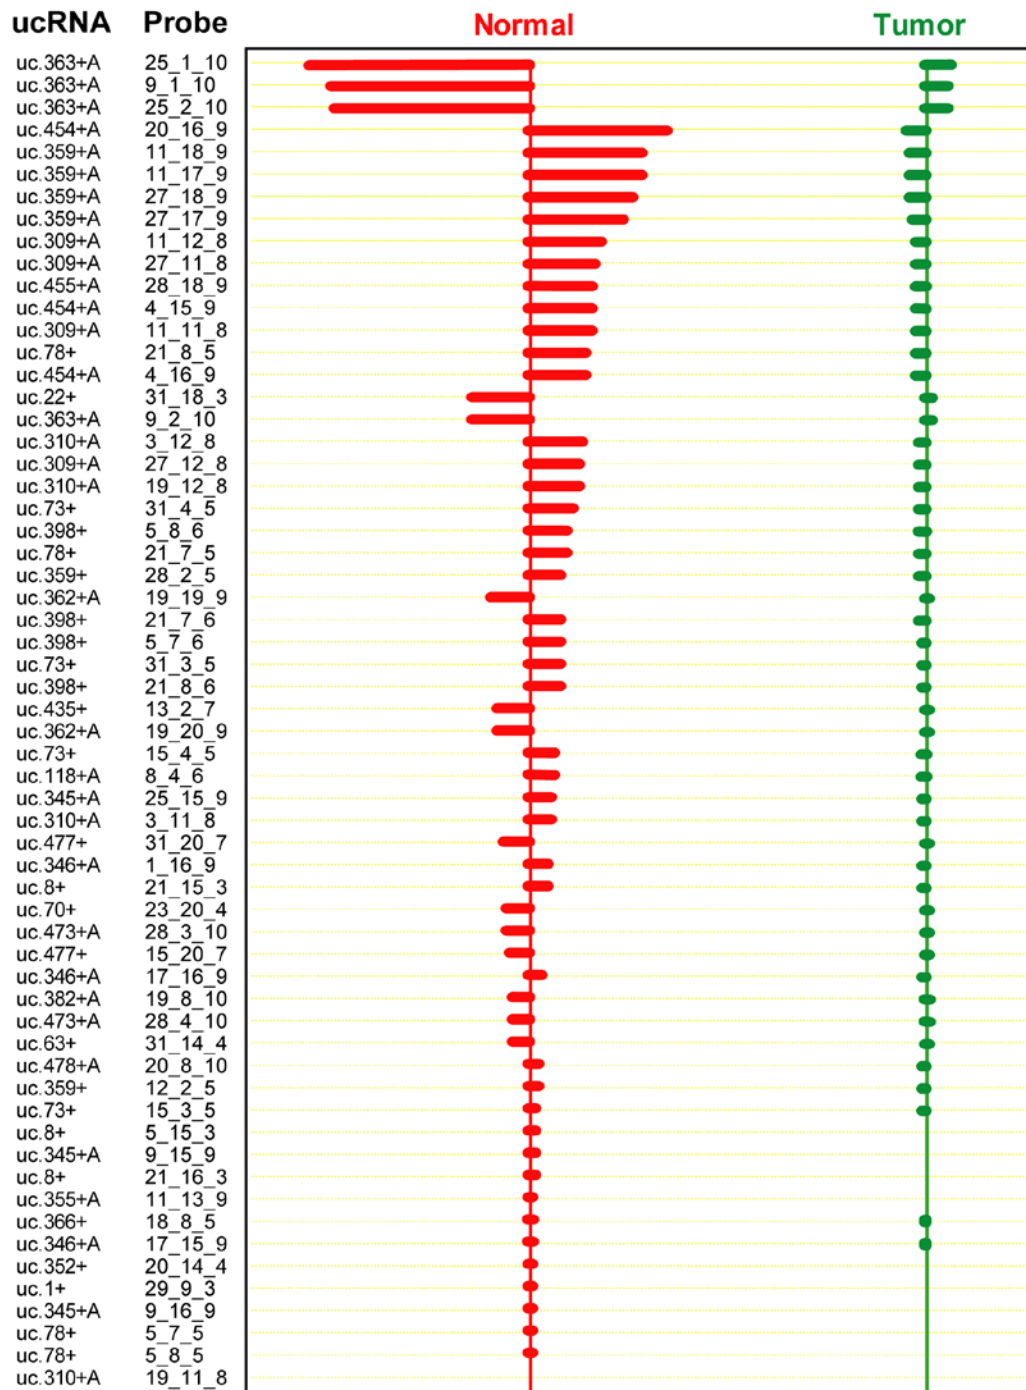

**Supplementary Figure 1.** Diagnostic 60 ucRNA probeset classifier. Prediction Analysis of Microarray (PAM) was used to identify ucRNAs that differentiate between tumor and non-tumor tissues. Shown are the shrunken centroid differences ( $d_{ik}$ ) for each of the 60 ucRNA probes.
